# Supplementary material for: Exploring the abundance of oleate hydratases in the genus Rhodococcus—discovery of novel enzymes with complementary substrate scope
Source: PubMed Central journal article supplement (PMC7306040; doi:10.1007/s00253-020-10627-7), 2020-05-01
Supplement: 253_2020_10627_MOESM1_ESM.pdf [file 253_2020_10627_MOESM1_ESM.pdf]

## Supplementary Information

### Applied Microbiology and Biotechnology

Exploring the abundance of oleate hydratases in the genus  
*Rhodococcus* – discovery of novel enzymes with complementary  
substrate scope

Hanna Busch, Fabio Tonin, Natália Alvarenga, Marcel van den Broek, Simona Lu, Jean-Marc Daran,  
Ulf Hanefeld and Peter-Leon Hagedoorn\*

Department of Biotechnology, Delft University of Technology, Van der Maasweg 9, 2629 HZ Delft,  
The Netherlands

Corresponding author: Peter-Leon Hagedoorn

Telephone: +31 (0)15 278 2334

Email: [P.L.Hagedoorn@tudelft.nl](mailto:P.L.Hagedoorn@tudelft.nl)

## Contents

|                                                                                                                                                                                                                        |    |
|------------------------------------------------------------------------------------------------------------------------------------------------------------------------------------------------------------------------|----|
| <b>Table S1:</b> Whole-genome sequencing data for <i>R. pyridinivorans</i> DSM 20415 .....                                                                                                                             | 1  |
| <b>Table S2:</b> List of <i>Rhodococcus</i> strains containing an oleate hydratase categorised based on their HFam affiliation.....                                                                                    | 1  |
| <b>Figure S1:</b> Phylogenetic tree of 43 investigated <i>Rhodococcus</i> strains based on 16S rRNA sequences .....                                                                                                    | 2  |
| <b>Figure S2:</b> Phylogenetic tree of discovered oleate hydratases from <i>Rhodococcus</i> showing three clades: (i) erythropolis-clade, (ii) equi-clade, (iii) pyridinivorans-clade. ....                            | 3  |
| <b>Figure S3:</b> CLUSTAL multiple sequence alignment of <i>Rhodococcus oleate</i> hydratases compared to <i>Em-OAH1</i> in the range of conserved FAD-binding region (G69-E96).....                                   | 4  |
| <b>Figure S4:</b> CLUSTAL multiple sequence alignment of <i>Rhodococcus</i> oleate hydratases compared to <i>Em-OAH1</i> in the area of conserved R118GGREM123 ( <i>Em-OAH1</i> ) motif .....                          | 4  |
| <b>Figure S5:</b> CLUSTAL multiple sequence alignment of <i>Rhodococcus</i> oleate hydratases compared to <i>Em-OAH1</i> in the area of conserved amino acids involved in carboxylate binding (T436 and N438) .....    | 4  |
| <b>Table S3:</b> Molecular structures of tested fatty acids.....                                                                                                                                                       | 5  |
| <b>Figure S6:</b> GC-MS chromatograms showing the products of <i>E. coli</i> whole-cell bioconversions of <i>ReOhy</i> (black) and <i>RpOhy</i> (pink) of fatty acid #1 – myrestoleic acid.....                        | 6  |
| <b>Figure S7:</b> Mass spectrum of silylated, hydroxylated myrestoleic acid .....                                                                                                                                      | 6  |
| <b>Figure S8:</b> GC-MS chromatograms showing the products of <i>E. coli</i> whole-cell bioconversions of <i>ReOhy</i> (black) and <i>RpOhy</i> (pink) of fatty acid #2 – palmitoleic acid .....                       | 6  |
| <b>Figure S9:</b> Mass spectrum of silylated, hydroxylated palmitoleic acid.....                                                                                                                                       | 7  |
| <b>Figure S10:</b> GC-MS chromatograms showing the products of <i>E. coli</i> whole-cell bioconversions of <i>ReOhy</i> (black) and <i>RpOhy</i> (pink) of fatty acid #3 – oleic acid. ....                            | 7  |
| <b>Figure S11:</b> Mass spectrum of silylated, hydroxylated oleic acid.....                                                                                                                                            | 7  |
| <b>Figure S12:</b> GC-MS chromatograms showing the products of <i>E. coli</i> whole-cell bioconversions of <i>ReOhy</i> (black) and <i>RpOhy</i> (pink) of fatty acid #4 – linoleic acid. ....                         | 8  |
| <b>Figure S13:</b> Mass spectrum of silylated, hydroxylated linoleic acid.....                                                                                                                                         | 8  |
| <b>Figure S14:</b> GC-MS chromatograms showing the products of <i>E. coli</i> whole-cell bioconversions of <i>ReOhy</i> (black) and <i>RpOhy</i> (pink) of fatty acid #5 – pinolenic acid .....                        | 8  |
| <b>Figure S15:</b> Mass spectrum of silylated, hydroxylated pinolenic acid.....                                                                                                                                        | 9  |
| <b>Figure S16:</b> GC-MS chromatograms showing the products of <i>E. coli</i> whole-cell bioconversions of <i>ReOhy</i> (black) and <i>RpOhy</i> (pink) of fatty acid #8 – $\gamma$ -linolenic acid.....               | 9  |
| <b>Figure S17:</b> Mass spectrum of silylated, hydroxylated $\gamma$ -linolenic acid.....                                                                                                                              | 9  |
| <b>Figure S18:</b> GC-MS chromatograms showing the products of <i>E. coli</i> whole-cell bioconversions of <i>ReOhy</i> (black) and <i>RpOhy</i> (pink) of fatty acid #9 – ricinoleic acid.....                        | 10 |
| <b>Figure S19:</b> Mass spectrum of silylated, hydroxylated ricinoleic acid.....                                                                                                                                       | 10 |
| <b>Figure S20:</b> GC-MS chromatograms showing the products of <i>E. coli</i> whole-cell bioconversions of <i>ReOhy</i> (black) and <i>RpOhy</i> (pink) of fatty acid #10 – <i>cis</i> -11-eicosenoic acid .....       | 10 |
| <b>Figure S21:</b> Mass spectrum of silylated, hydroxylated <i>cis</i> -11-eicosenoic acid.....                                                                                                                        | 11 |
| <b>Figure S22:</b> GC-MS chromatograms showing the products of <i>E. coli</i> whole-cell bioconversions of <i>ReOhy</i> (black) and <i>RpOhy</i> (pink) of fatty acid #11 – <i>cis</i> -11,14-eicosadienoic acid ..... | 11 |
| <b>Figure S23:</b> Mass spectrum of silylated, hydroxylated <i>cis</i> -11,14-eicosadienoic acid.....                                                                                                                  | 11 |

|                                                                                                                                                                                                                          |           |
|--------------------------------------------------------------------------------------------------------------------------------------------------------------------------------------------------------------------------|-----------|
| <b>Figure S24:</b> GC-MS chromatograms showing the products of <i>E. coli</i> whole-cell bioconversions of <i>ReOhy</i> (black) and <i>RpOhy</i> (pink) of fatty acid #12 – <i>cis</i> -8,11,14-eicosatrienoic acid..... | <b>12</b> |
| <b>Figure S25:</b> Mass spectrum of silylated, hydroxylated <i>cis</i> -11,14-eicosadienoic acid.....                                                                                                                    | <b>12</b> |
| <b>Figure S26:</b> GC-MS chromatograms showing the products of <i>E. coli</i> whole-cell bioconversions of <i>ReOhy</i> (black) and <i>RpOhy</i> (pink) of fatty acid #13 – arachidonic acid .....                       | <b>12</b> |
| <b>Figure S27:</b> Mass spectrum of silylated, hydroxylated arachidonic acid.....                                                                                                                                        | <b>13</b> |
| <b>Figure S28:</b> GC-MS chromatograms showing the products of <i>E. coli</i> whole-cell bioconversions of <i>ReOhy</i> (black) and <i>RpOhy</i> (pink) of fatty acid #14 – erucic acid .....                            | <b>13</b> |
| <b>Figure S29:</b> Mass spectrum of silylated, hydroxylated erucic acid.....                                                                                                                                             | <b>13</b> |
| <b>Figure S30:</b> Size exclusion chromatography of <i>RpOhy</i> .....                                                                                                                                                   | <b>14</b> |
| <b>Table S4:</b> Molecular weight estimation <i>RpOhy</i> .....                                                                                                                                                          | <b>14</b> |
| <b>Figure S31:</b> Influence of FAD addition to biotransformation of oleic acid to 10-hydroxystearic acid.....                                                                                                           | <b>15</b> |
| <b>Figure S32:</b> UV-visible absorption spectrum of purified <i>RpOhy</i> in the range from 300 – 600 nm .....                                                                                                          | <b>15</b> |
| <b>Nucleotide sequence <i>RpOhy</i> .....</b>                                                                                                                                                                            | <b>16</b> |
| <b>Amino-acid sequence <i>RpOhy</i> .....</b>                                                                                                                                                                            | <b>16</b> |
| <b>Nucleotide sequence synthetic <i>RpOhy</i> construct codon optimized for <i>E. coli</i> including his-tag .....</b>                                                                                                   | <b>17</b> |
| <b>Amino-acid sequence synthetic <i>RpOhy</i> contstruct including histag .....</b>                                                                                                                                      | <b>17</b> |
| <b>References.....</b>                                                                                                                                                                                                   | <b>18</b> |

Table S1: Whole-genome sequencing data for *R. pyridinivorans* DSM 20415 (Aziz et al. 2008).

|                            |           |
|----------------------------|-----------|
| Genome Size [kb]           | 5,275,644 |
| GC content [%]             | 67.7      |
| N50                        | 204034    |
| L50                        | 7         |
| Number of contigs (> 1kbp) | 174       |
| Number of subsystems       | 426       |
| Number of coding sequences | 5018      |
| Number of RNAs             | 67        |

Table S2: List of *Rhodococcus* strains containing an oleate hydratase categorised based on their HFam affiliation (Schmid et al. 2016).

| HFam1                              | HFam2                                       | HFam3                                     |
|------------------------------------|---------------------------------------------|-------------------------------------------|
| <i>Rhodococcus equi</i> 103S       | <i>Rhodococcus biphenylivorans</i> TG9      | <i>Rhodococcus</i> R312                   |
| <i>Rhodococcus equi</i> ATCC 33707 | <i>Rhodococcus pyridinivorans</i> DSM 20415 | <i>Rhodococcus enclensis</i> NIO-1009     |
| <i>Rhodococcus equi</i> DSSKP-R001 | <i>Rhodococcus pyridinivorans</i> GF3       | <i>Rhodococcus erythropolis</i> BG43      |
|                                    | <i>Rhodococcus pyridinivorans</i> SB3094    | <i>Rhodococcus erythropolis</i> CCM2595   |
|                                    | <i>Rhodococcus erythropolis</i> DSM 43066   | <i>Rhodococcus erythropolis</i> PR4       |
|                                    |                                             | <i>Rhodococcus erythropolis</i> DSM 43066 |
|                                    |                                             | <i>Rhodococcus qingshengii</i> DSM 45257  |
|                                    |                                             | <i>Rhodococcus qingshengii</i> DSM 46766  |
|                                    |                                             | <i>Rhodococcus qingshengii</i> dil-6-2    |
|                                    |                                             | <i>Rhodococcus rhodochrous</i> DSM 101666 |
|                                    |                                             | <i>Rhodococcus rhodochrous</i> ATCC 17895 |

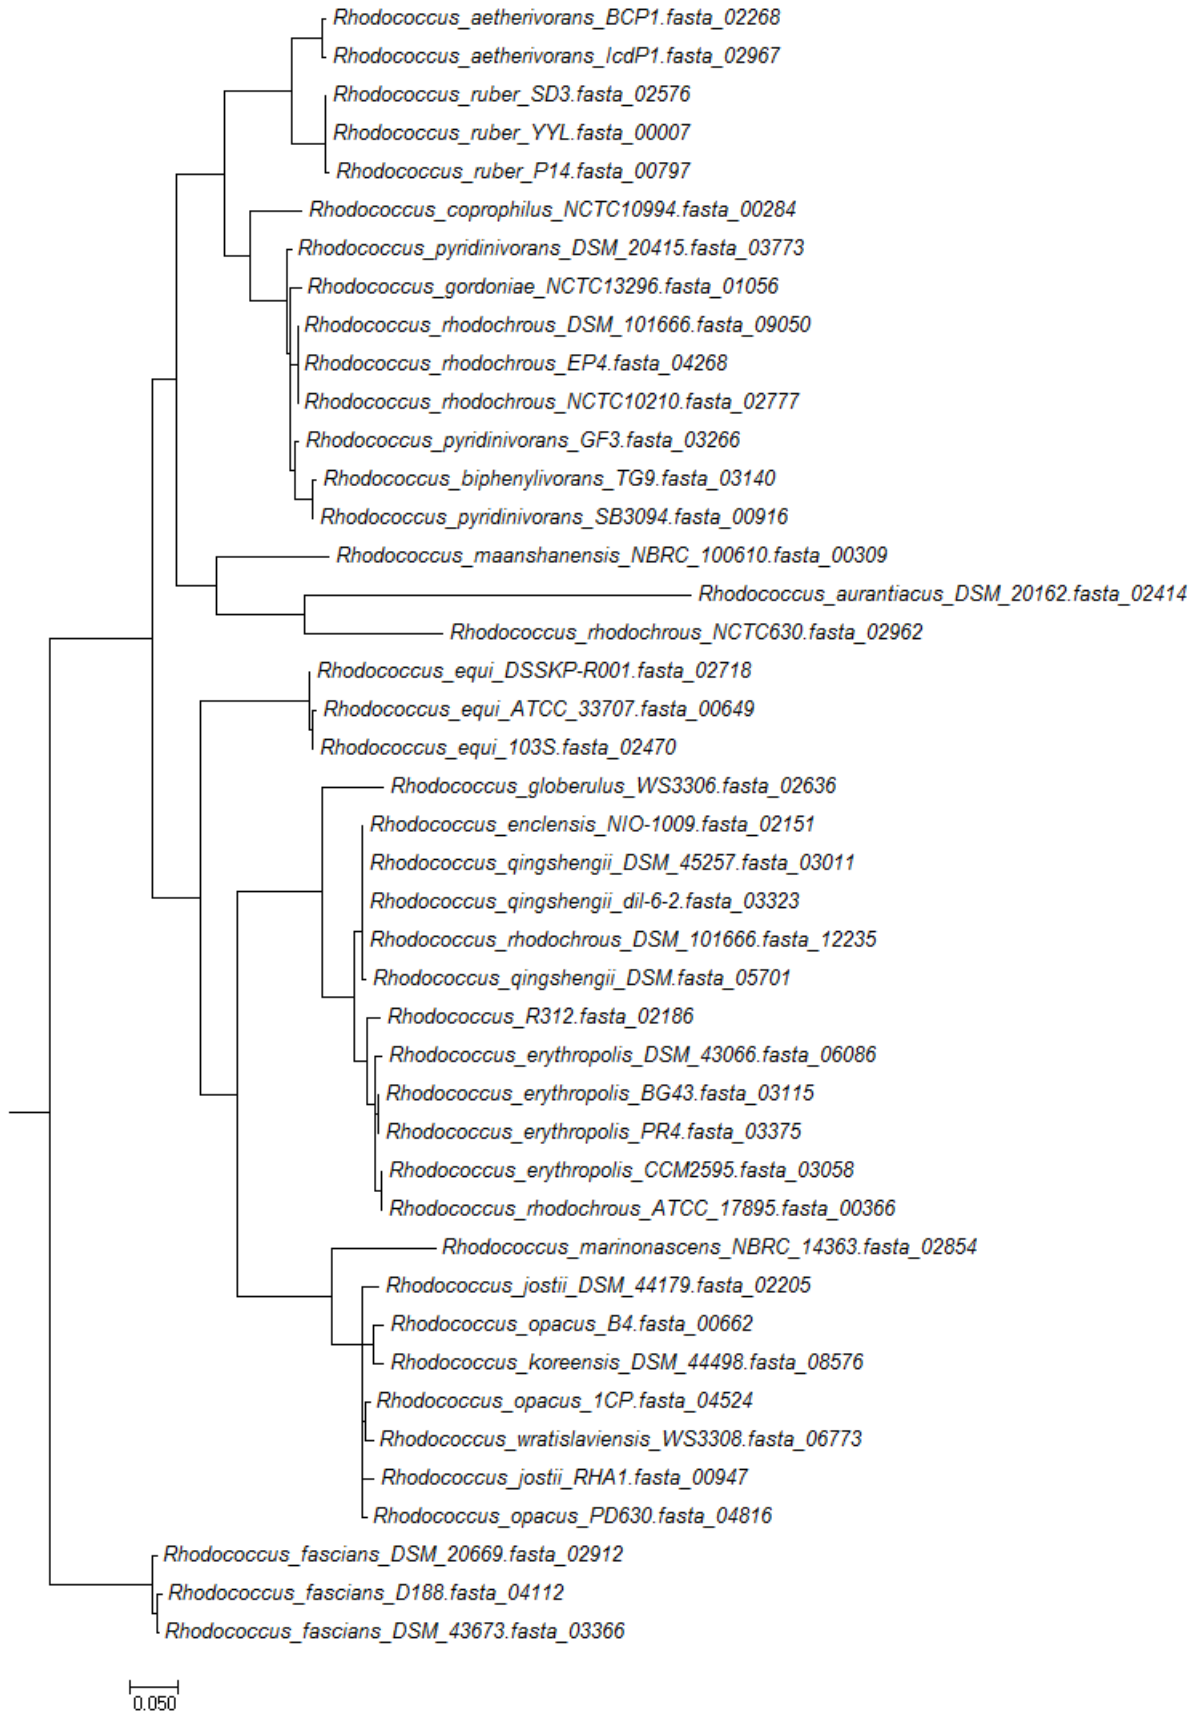

Figure S1: Phylogenetic tree of 43 investigated *Rhodococcus* strains based on 16S rRNA sequences (Edgar 2004; Price et al. 2010).

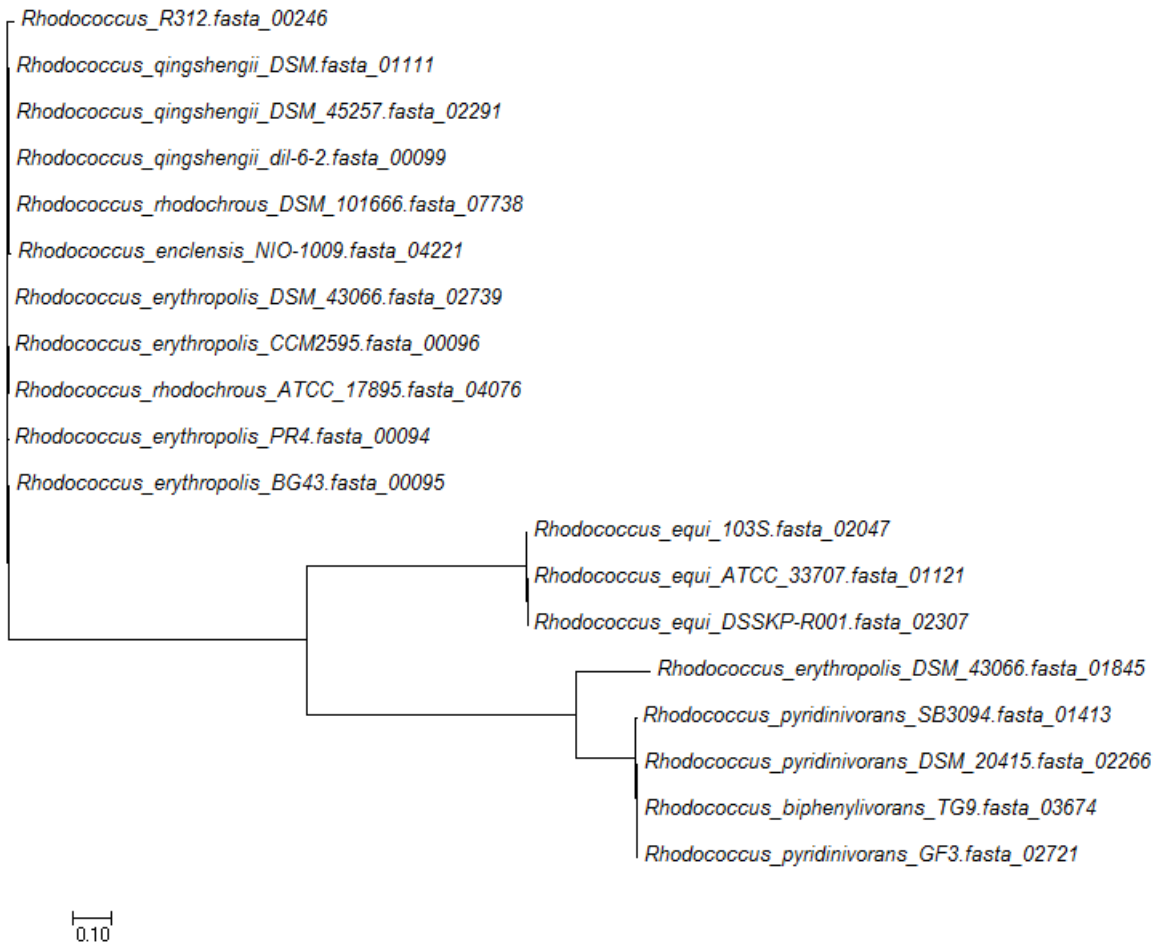

Figure S2: Phylogenetic tree of discovered oleate hydratases from *Rhodococcus* showing three clades: (i) *erythropolis*-clade, (ii) *equi*-clade, (iii) *pyridinivorans*-clade.

While the *erythropolis*- and *equi*-clades are built up uniformly, the *pyridinivorans*-clade is split in two sub-groups. Here, the second oleate hydratase from *R. erythropolis* DSM 43066 forms its own sub-group, while the oleate hydratases from *pyridinivorans* and *biphenylivorans* are closely related. Oleate hydratase protein sequences were aligned using muscle (version 3.8.31)(Edgar 2004). Distance-matrix was calculated by FastTree (version 2.1.9, JTT+CAT model) and then visualised by MEGA (Price et al. 2010; Kumar et al. 2016).



Table S3: Molecular structures of tested fatty acids.

| #  | Name                                                                 | molecular structure                                                                  |
|----|----------------------------------------------------------------------|--------------------------------------------------------------------------------------|
| 1  | myristoleic acid<br>14:1, <i>cis</i> -9                              | 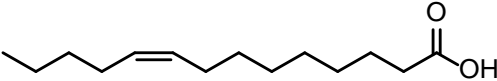   |
| 2  | palmitoleic acid<br>16:1, <i>cis</i> -9                              |    |
| 3  | oleic acid<br>18:1, <i>cis</i> -9                                    |    |
| 4  | linoleic acid<br>18:2, <i>cis</i> -9,12                              |    |
| 5  | pinolenic acid<br>18:3, <i>cis</i> -5,9,12                           |    |
| 6  | <i>cis</i> -vaccenic acid<br>18:1, <i>cis</i> -11                    |   |
| 7  | <i>trans</i> -vaccenic acid<br>18:1, <i>trans</i> -11                |  |
| 8  | $\gamma$ -linolenic acid<br>18:3, <i>cis</i> -6,9,12                 |  |
| 9  | ricinoleic acid<br>18:1, <i>cis</i> -9, ( <i>R</i> )-12-OH           |  |
| 10 | <i>cis</i> -11-eicosenoic acid<br>20:1, <i>cis</i> -11               |  |
| 11 | <i>cis</i> -11,14-eicosadienoic acid<br>20:2, <i>cis</i> -8,11       |  |
| 12 | <i>cis</i> -8,11,14-eicosatrienoic acid<br>20:3, <i>cis</i> -8,11,14 |  |
| 13 | arachidonic acid<br>20:4, <i>cis</i> -5,8,11,14                      |  |
| 14 | erucic acid<br>22:1, <i>cis</i> -13                                  |  |
| 15 | nervonic acid<br>24:1, <i>cis</i> -15                                |  |



## GC-MS data of hydroxylated fatty acids:

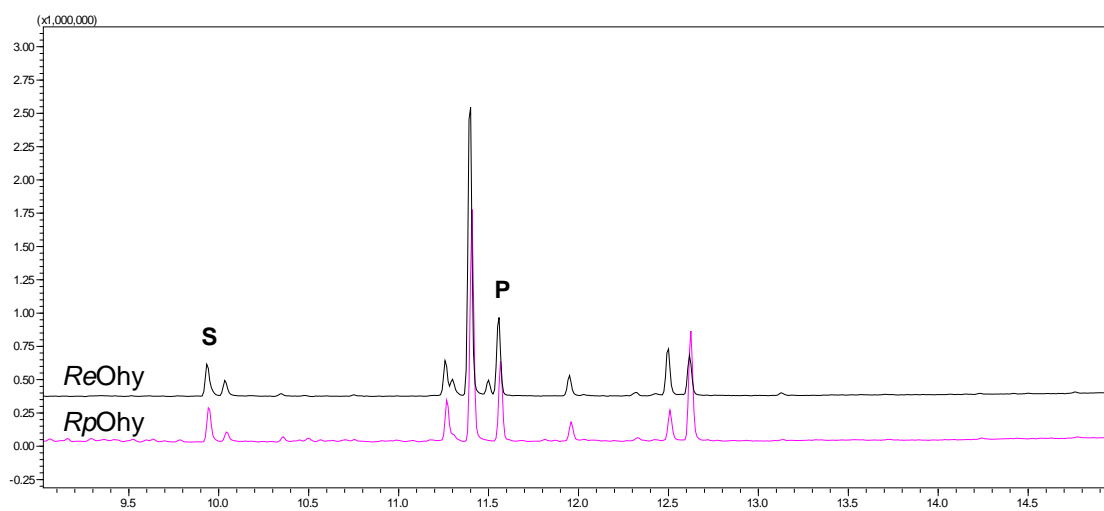

Figure S6: GC-MS chromatograms showing the products of *E. coli* whole-cell bioconversions of *ReOhy* (black) and *RpOhy* (pink) of fatty acid #1 – myristoleic acid. S: substrate, P: product.

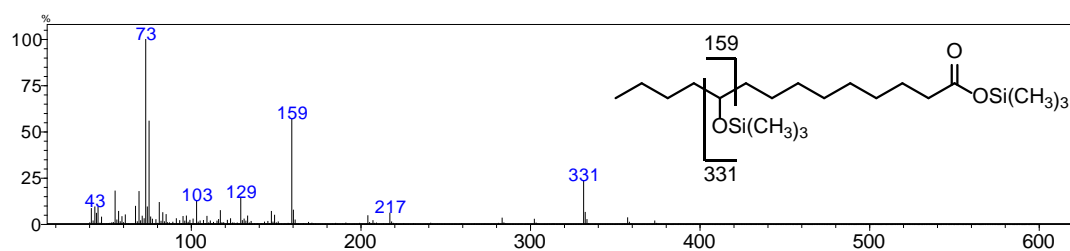

Figure S7: Mass spectrum of silylated, hydroxylated myristoleic acid with significant fragment ions:  $m/z$  159 and 331.

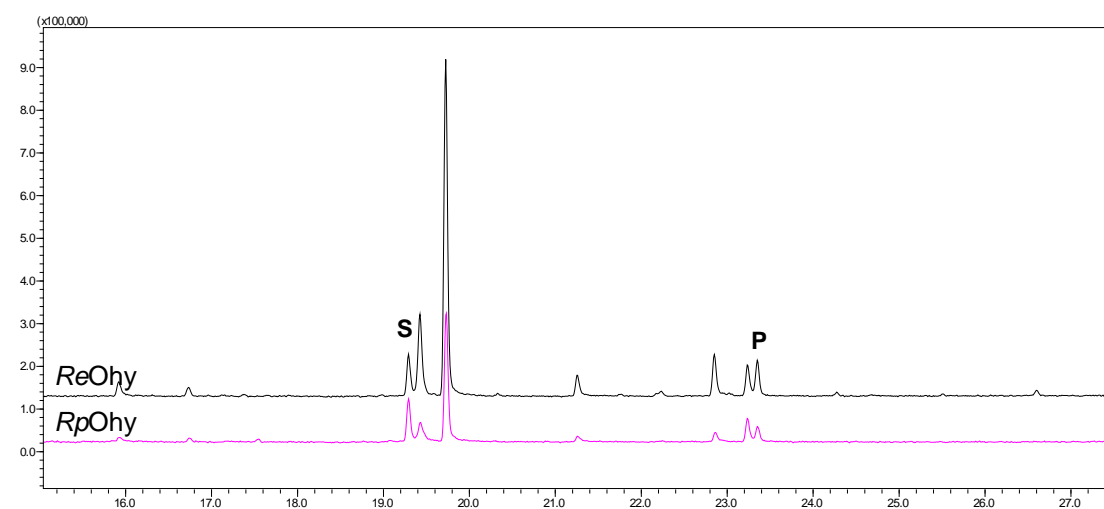

Figure S8: GC-MS chromatograms showing the products of *E. coli* whole-cell bioconversions of *ReOhy* (black) and *RpOhy* (pink) of fatty acid #2 – palmitoleic acid. S: substrate, P: product.

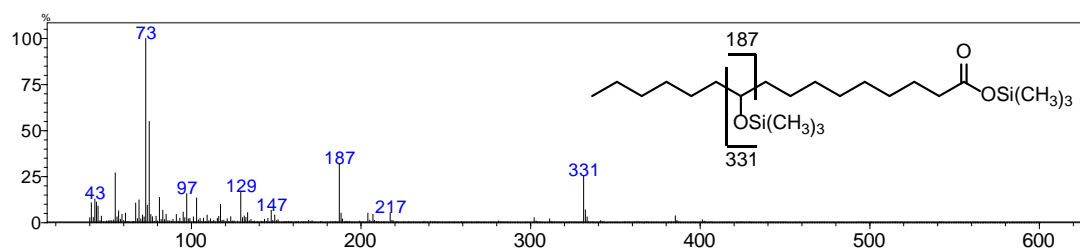

Figure S9: Mass spectrum of silylated, hydroxylated palmitoleic acid with significant fragment ions:  $m/z$  187 and 331.

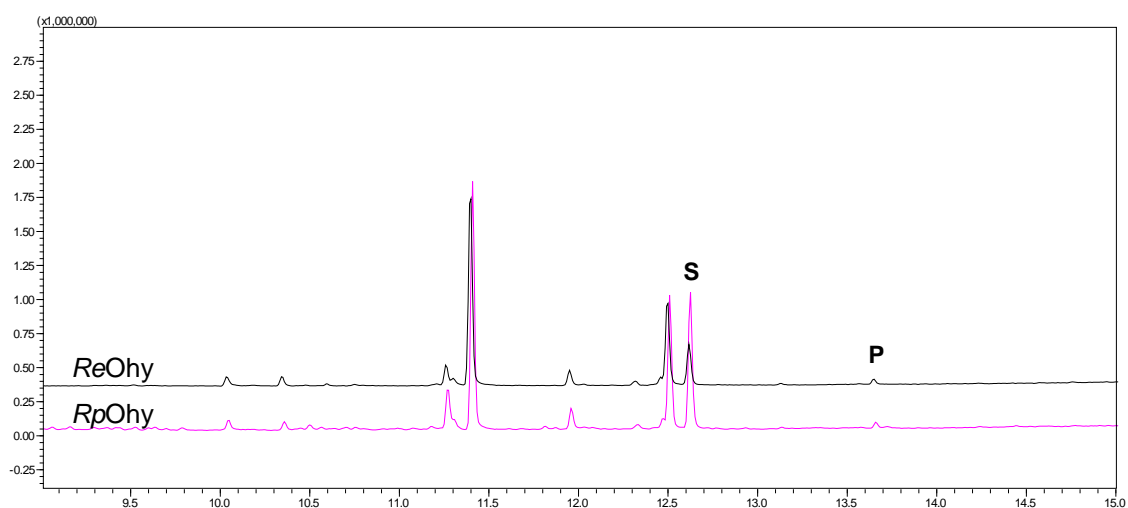

Figure S10: GC-MS chromatograms showing the products of *E. coli* whole-cell bioconversions of *ReOhy* (black) and *RpOhy* (pink) of fatty acid #3 – oleic acid. S: substrate, P: product.

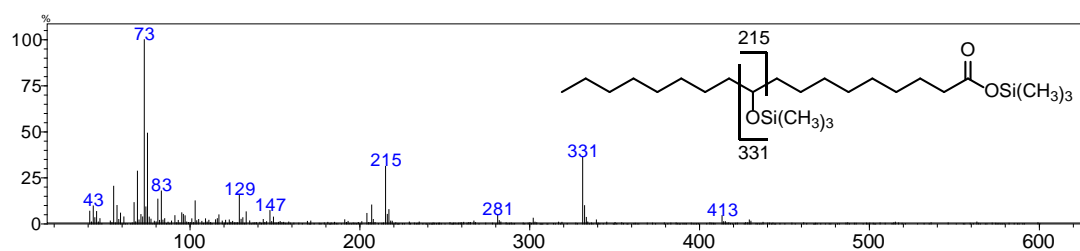

Figure S11: Mass spectrum of silylated, hydroxylated oleic acid with significant fragment ions:  $m/z$  215 and 331.

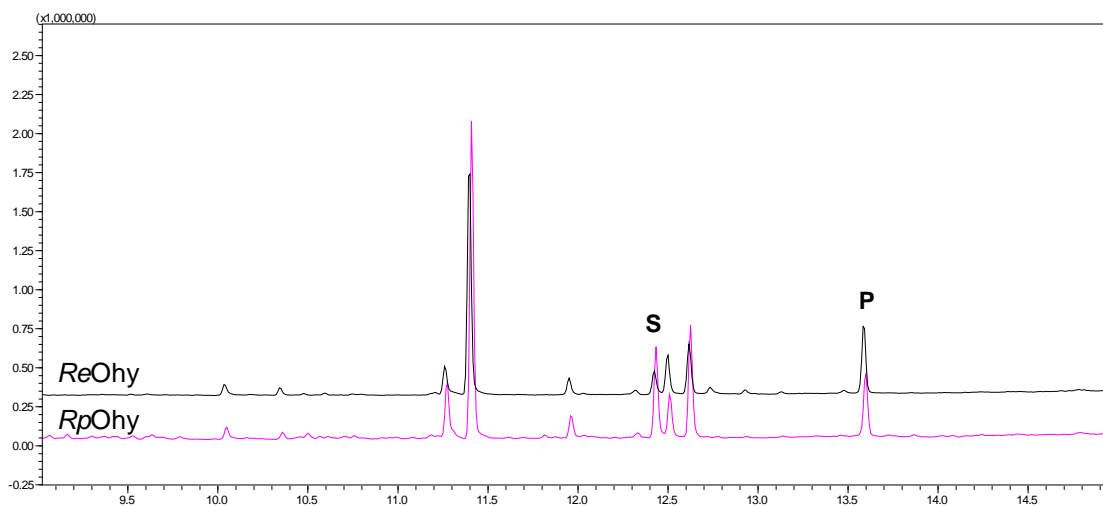

Figure S12: GC-MS chromatograms showing the products of *E. coli* whole-cell bioconversions of *ReOhy* (black) and *RpOhy* (pink) of fatty acid #4 – linoleic acid. S: substrate, P: product.

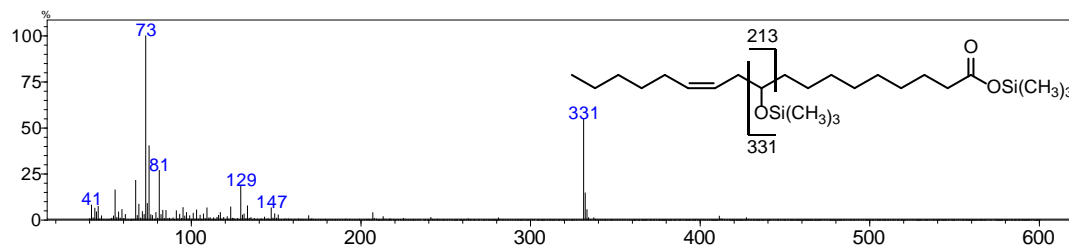

Figure S13: Mass spectrum of silylated, hydroxylated linoleic acid with significant fragment ion:  $m/z$  331. Ion 213 was not detected due to an re-arrangement following the allyl-position of the alcohol.

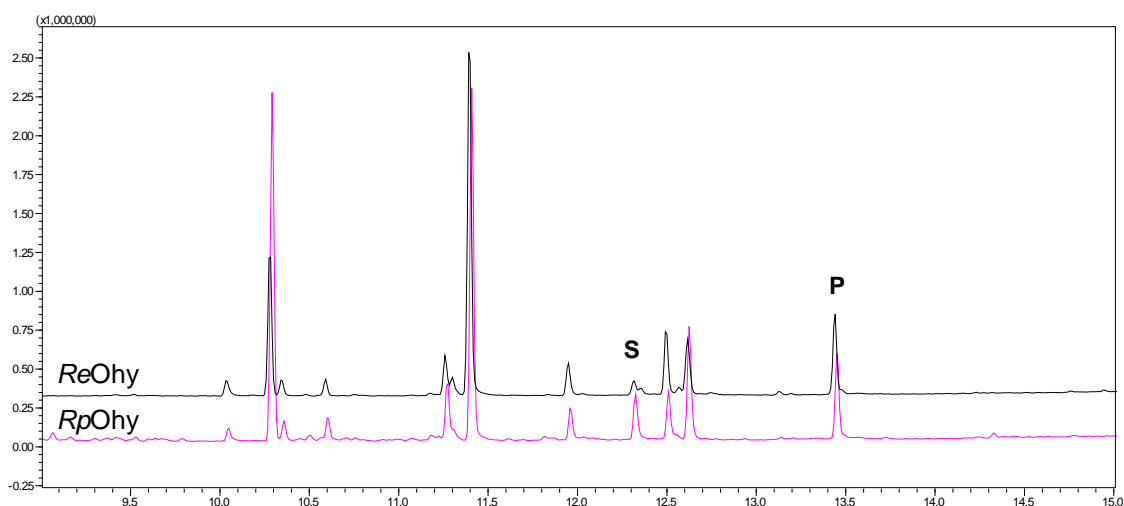

Figure S14: GC-MS chromatograms showing the products of *E. coli* whole-cell bioconversions of *ReOhy* (black) and *RpOhy* (pink) of fatty acid #5 – pinolenic acid. S: substrate, P: product.

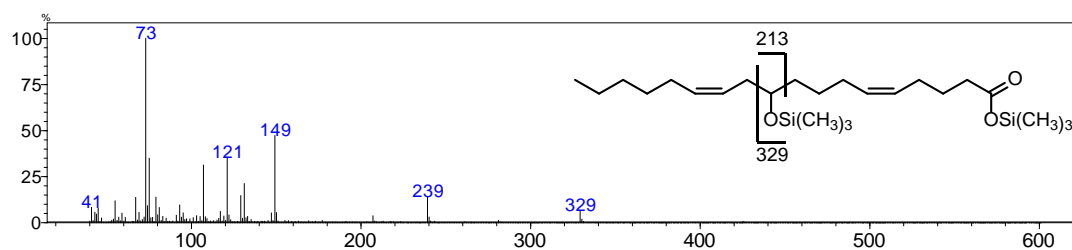

Figure S15: Mass spectrum of silylated, hydroxylated pinolenic acid with significant fragment ions highlighted:  $m/z$  329. Ion 213 was not detected due to a re-arrangement following the allyl-position of the alcohol.

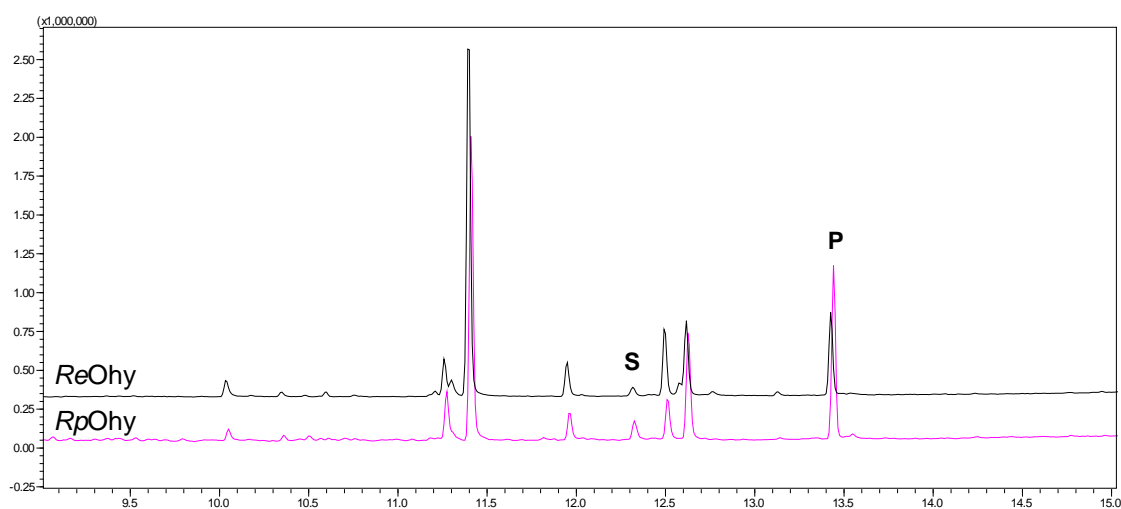

Figure S16: GC-MS chromatograms showing the products of *E. coli* whole-cell bioconversions of *ReOhy* (black) and *RpOhy* (pink) of fatty acid #8 –  $\gamma$ -linolenic acid. S: substrate, P: product.

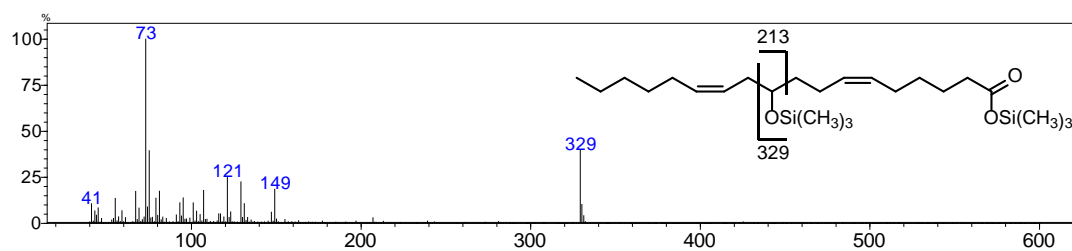

Figure S17: Mass spectrum of silylated, hydroxylated  $\gamma$ -linolenic acid with significant fragment ions highlighted:  $m/z$  329. Ion 213 was not detected due to a re-arrangement following the allyl-position of the alcohol.

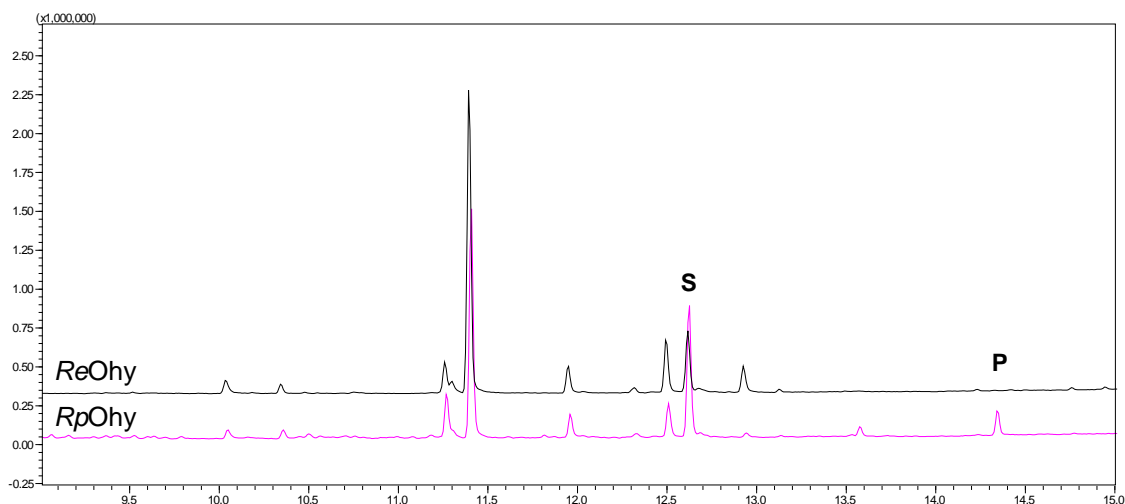

Figure S18: GC-MS chromatograms showing the products of *E. coli* whole-cell bioconversions of *ReOhy* (black) and *RpOhy* (pink) of fatty acid #9 – ricinoleic acid. S: substrate, P: product.

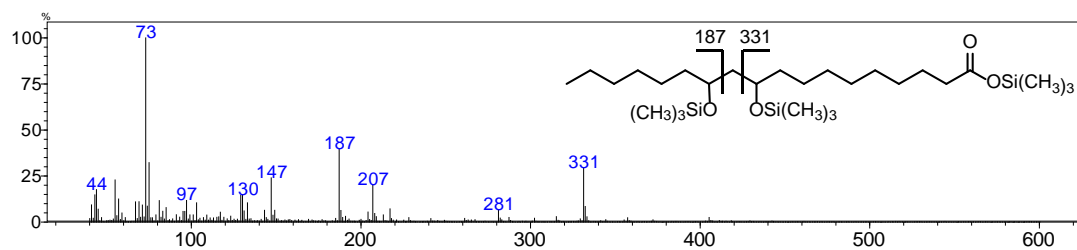

Figure S19: Mass spectrum of silylated, hydroxylated ricinoleic acid with significant fragment ions highlighted:  $m/z$  187 and 331.

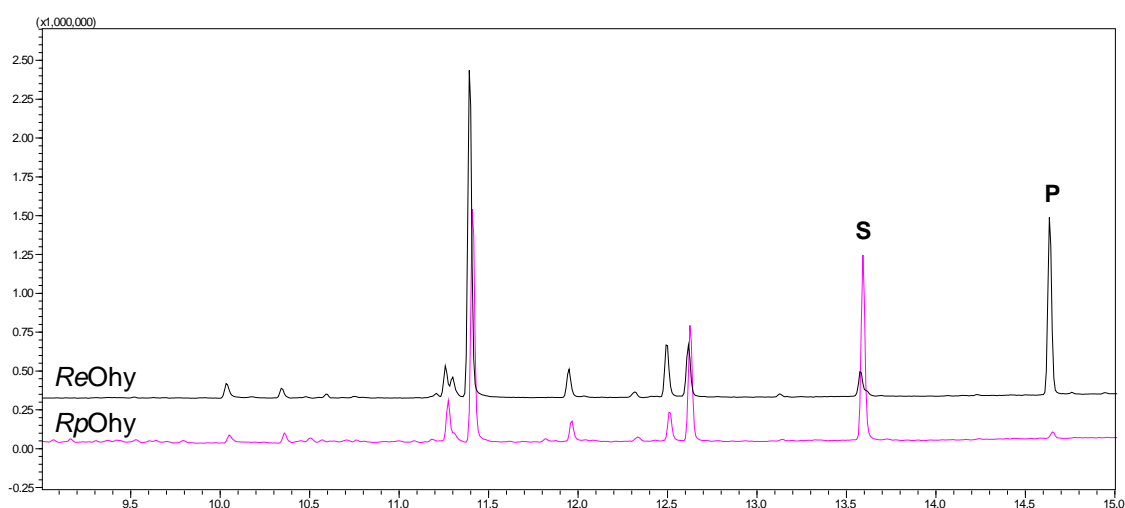

Figure S20: GC-MS chromatograms showing the products of *E. coli* whole-cell bioconversions of *ReOhy* (black) and *RpOhy* (pink) of fatty acid #10 – *cis*-11-eicosenoic acid. S: substrate, P: product.

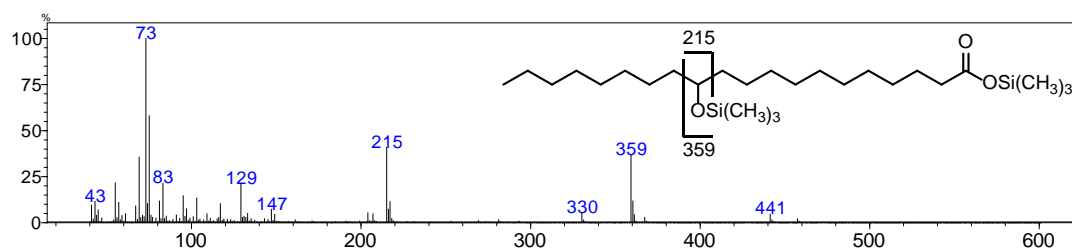

Figure S21: Mass spectrum of silylated, hydroxylated *cis*-11-eicosenoic acid with significant fragment ions highlighted:  $m/z$  215 and 359.

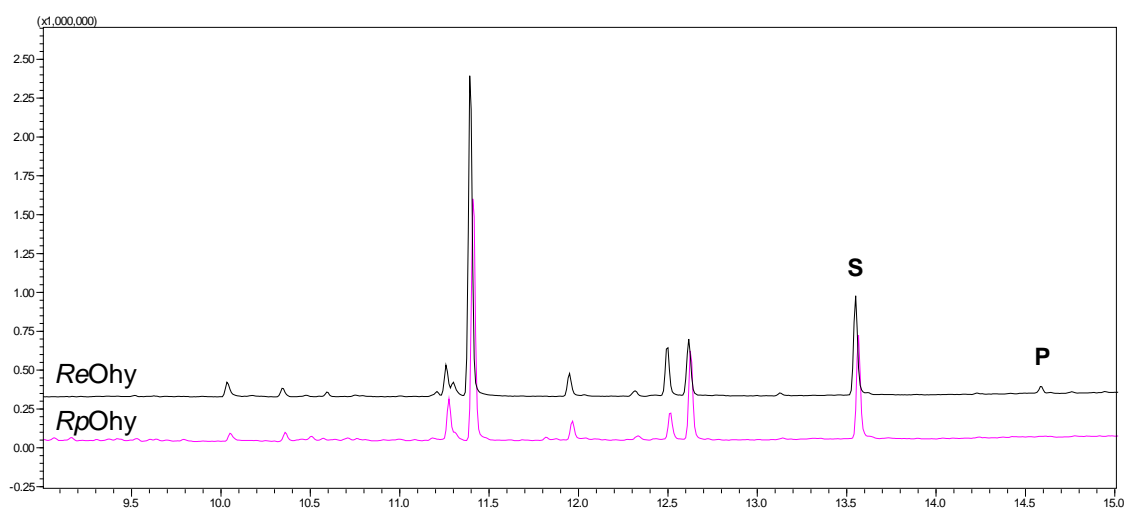

Figure S22: GC-MS chromatograms showing the products of *E. coli* whole-cell bioconversions of *ReOhy* (black) and *RpOhy* (pink) of fatty acid #11 – *cis*-11,14-eicosadienoic acid. S: substrate, P: product.

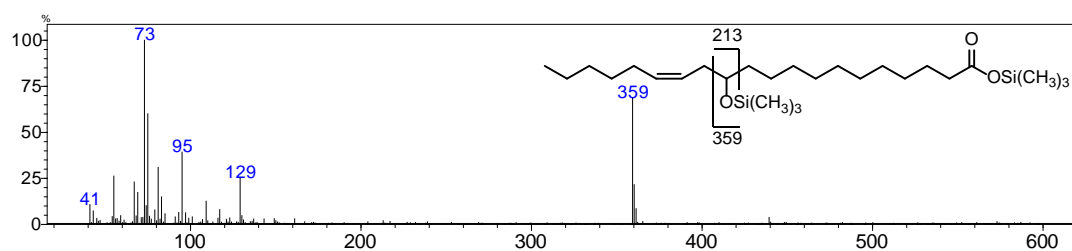

Figure S23: Mass spectrum of silylated, hydroxylated *cis*-11,14-eicosadienoic acid with significant fragment ions highlighted:  $m/z$  359. Ion 213 was not detected due to a re-arrangement following the allyl-position of the alcohol.

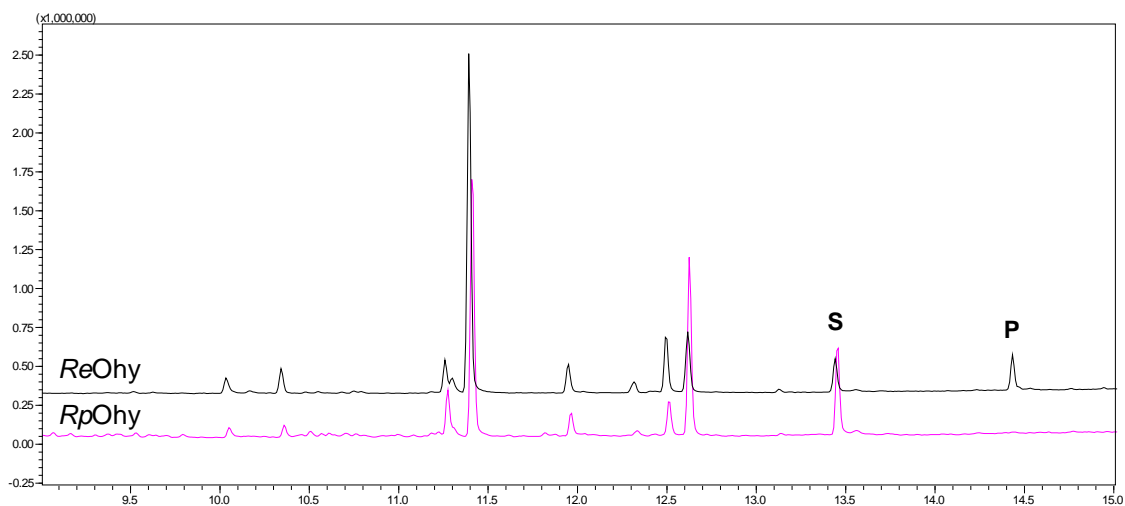

Figure S24: GC-MS chromatograms showing the products of *E. coli* whole-cell bioconversions of *ReOhy* (black) and *RpOhy* (pink) of fatty acid #12 – *cis*-8,11,14-eicosatrienoic acid. S: substrate, P: product.

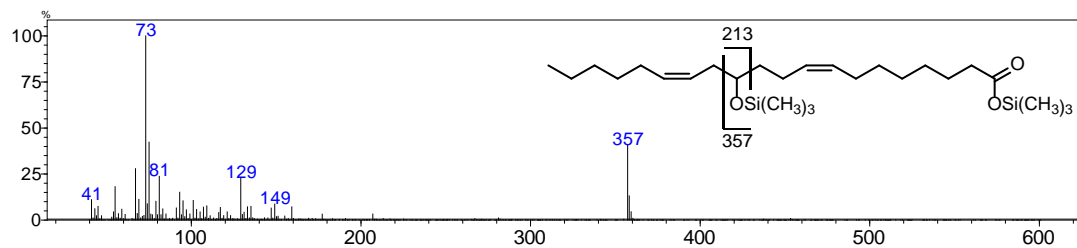

Figure S25: Mass spectrum of silylated, hydroxylated *cis*-11,14-eicosadienoic acid with significant fragment ions highlighted:  $m/z$  357. Ion 213 was not detected due to a re-arrangement following the allyl-position of the alcohol.

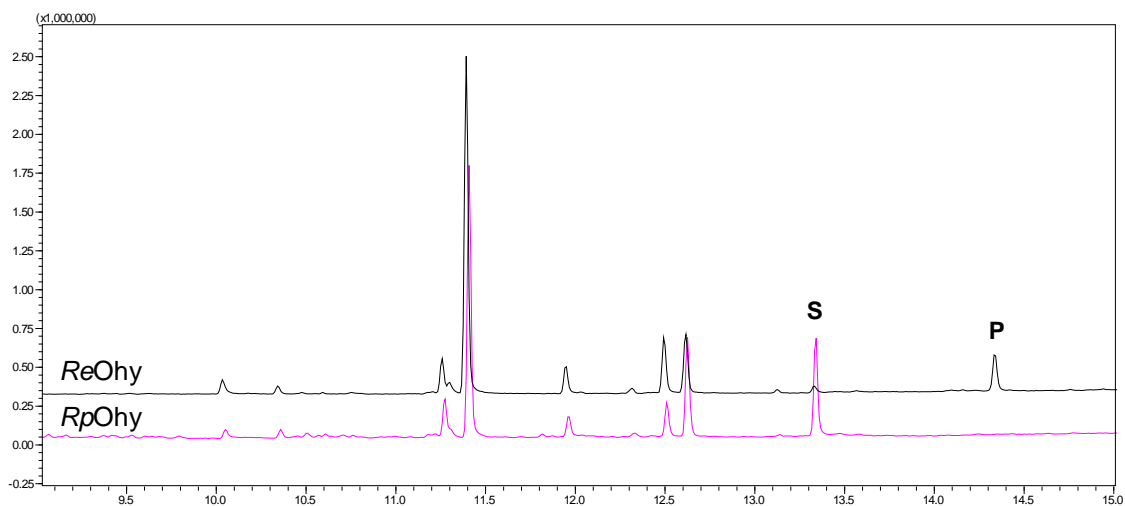

Figure S26: GC-MS chromatograms showing the products of *E. coli* whole-cell bioconversions of *ReOhy* (black) and *RpOhy* (pink) of fatty acid #13 – arachidonic acid. S: substrate, P: product.

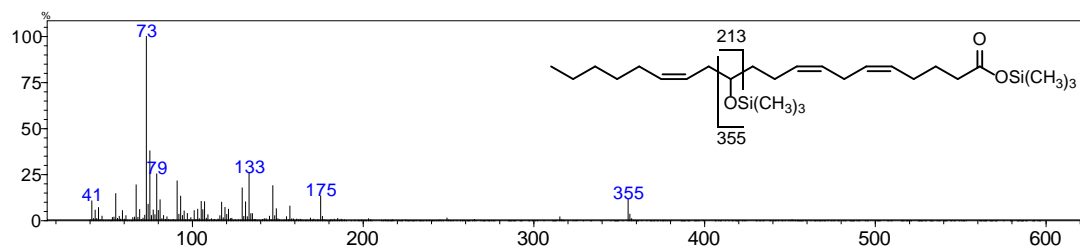

Figure S27: Mass spectrum of silylated, hydroxylated arachidonic acid with significant fragment ions highlighted:  $m/z$  355. Ion 213 was not detected due to a re-arrangement following the allyl-position of the alcohol.

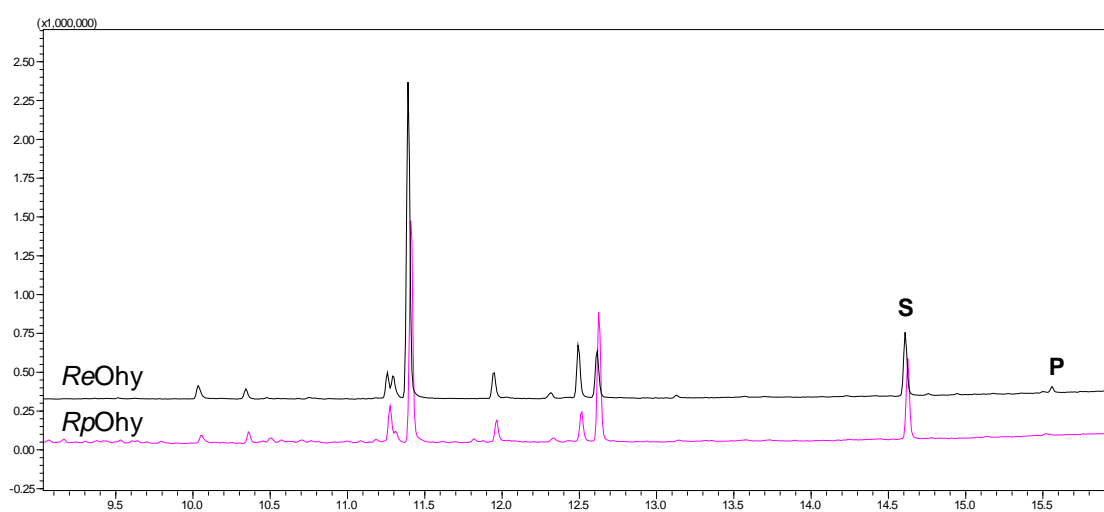

Figure S28: GC-MS chromatograms showing the products of *E. coli* whole-cell bioconversions of *ReOhy* (black) and *RpOhy* (pink) of fatty acid #14 – erucic acid. S: substrate, P: product.

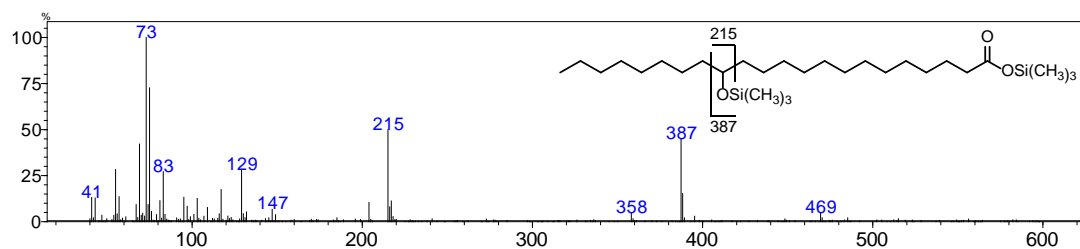

Figure S29: Mass spectrum of silylated, hydroxylated erucic acid with significant fragment ions highlighted:  $m/z$  215 and 387.



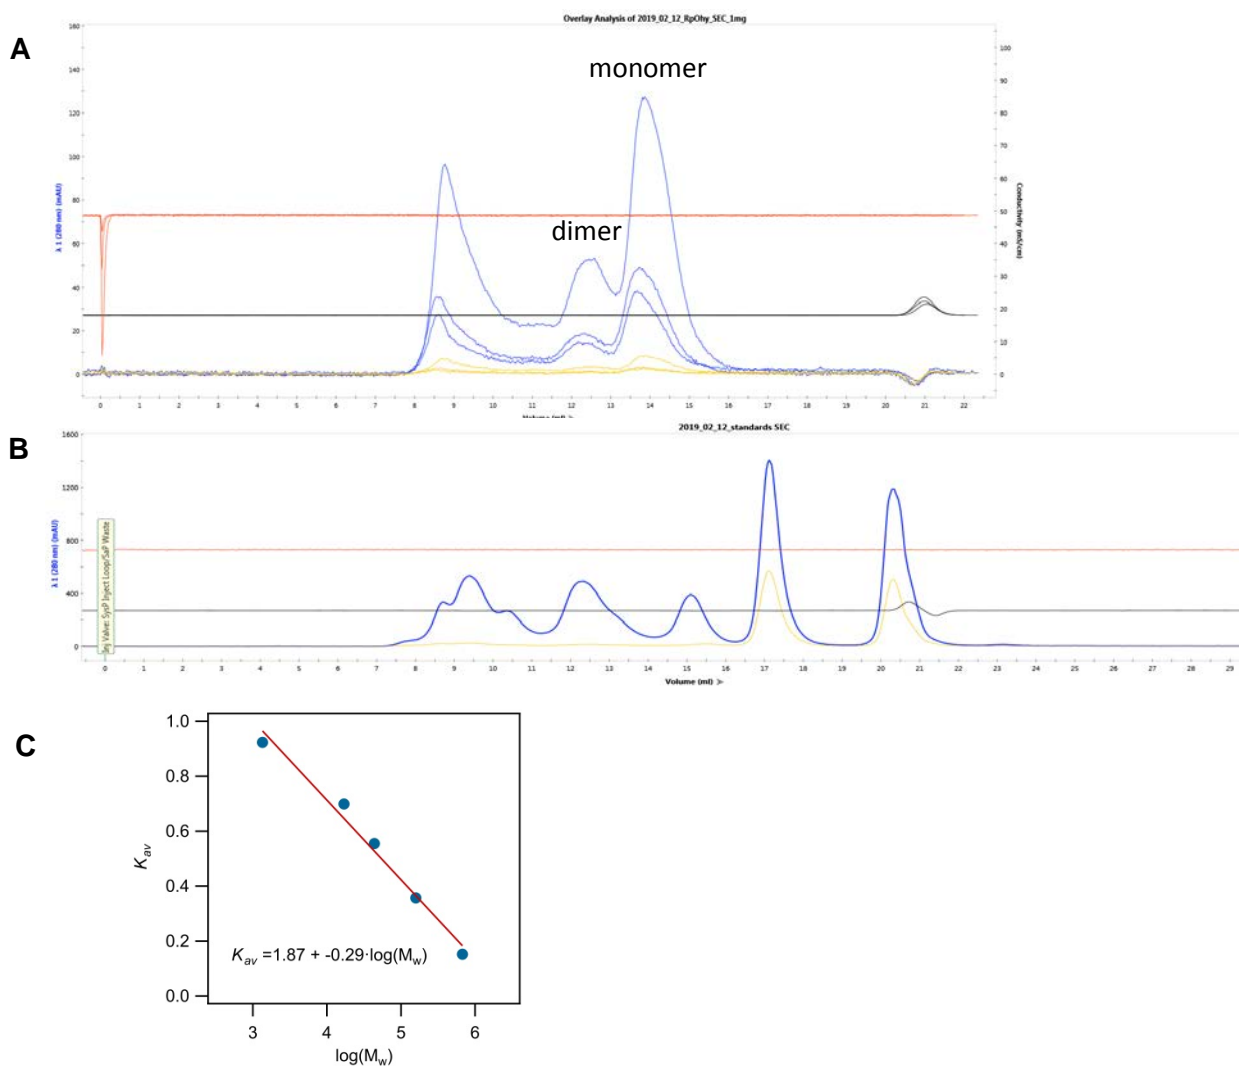

Figure S30: Size exclusion chromatography of *RpOhy*

A) Analytical SEC of 1, 5 and 10 mg *RpOhy*; B) Protein standards SEC with Thyroglobulin (670 kDa),  $\gamma$ -globulin (158 kDa), Ovalbumin (44 kDa), Myoglobin (17 kDa) and Vitamin B12 (1.35 kDa); C) SEC calibration curve. SEC conditions: Superdex S200 10/300 GL running with 0.5 ml/min 20 mM Tris pH 8.0 containing 250 mM NaCl.

Table S4: Molecular weight estimation *RpOhy*

| Peak | $V_e$ (ml) | $K_{av}$ | Mw calculated (kDa) | Apparent oligomeric state |
|------|------------|----------|---------------------|---------------------------|
| 1    | 8.76       | 0.110    | 1,200               | 18                        |
| 2    | 12.4       | 0.369    | 153                 | 2.3                       |
| 3    | 13.9       | 0.473    | 67.4                | 0.99                      |

$V_e$  is the elution volume. Void volume  $V_o = 7.2$  ml, total column volume  $V_t = 21.4$  ml. Gel-phase distribution

coefficient  $K_{av} = \frac{V_e - V_o}{V_t - V_o}$

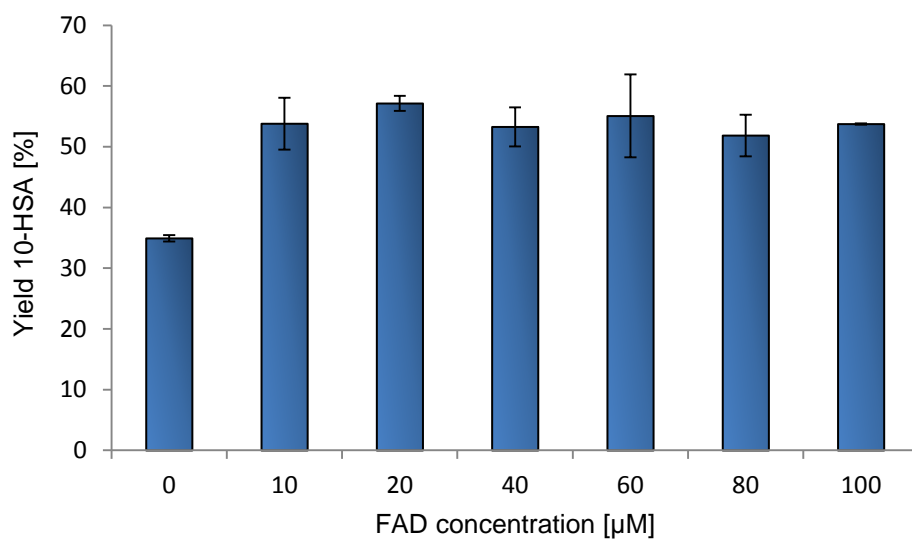

Figure S31: Influence of FAD addition to biotransformation of oleic acid to 10-hydroxystearic acid. *Reaction conditions:* 5 µM *RpOhy*, 20 mM acetate buffer (pH 5), 500 µM oleic acid, 1% DMSO, 5 h, 30 °C.

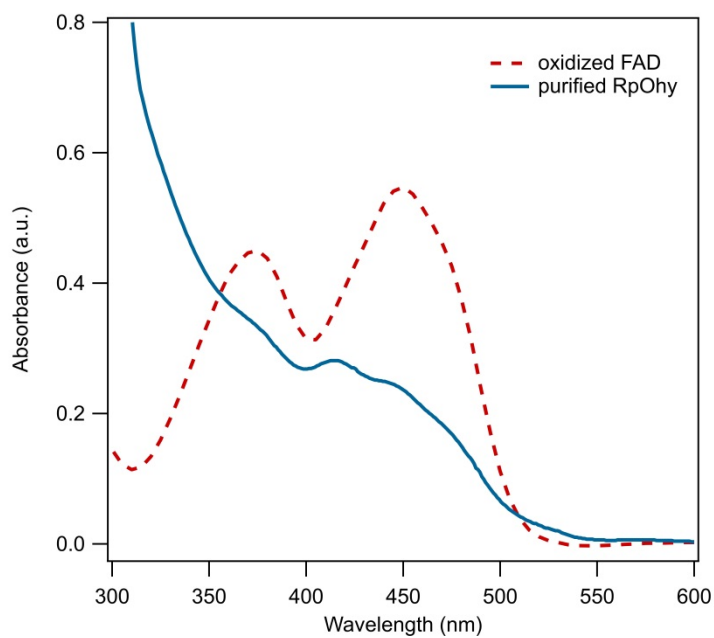

Figure S32: UV-visible absorption spectrum of purified *RpOhy* in the range from 300 – 600 nm (blue, solid line) with oxidised FAD as a reference (red, dashed line).

### Nucleotide sequence *RpOhy*

ATGTA CTACAGCAGTGGAAACTACGAAGCCTTCGCCCGCCCCCGCAAGCCCGAGGGAGTCGAGAACAAGACCCGCTGGTTCTGTCGGCG  
CCGGGCTCACCTCGATGGCCTCGGCGGTGTTTCATGATCCGCGACGGGCAACTCTCCGGCGACAAGATCACAATCCTCGAGCGCCTGGA  
CCTGCCCGGGCGGCGCGTGGACGGTATCAAGAAGCCGGACAAAGGGTTTGTTCATCCGCGGGCGGCGGAGATGGAAGACCACATGGAG  
TGCTCTGGGATCTGTTCCGCACCATCCCGTCGCTCGAGGTCGACGGATCCGTCCTCGACGAGTTCTACTGGCTCAACAAGACGACC  
CCAACTACTCACTCAACCGGGTCACACACCGGCAGGGCGAGGAGTTCGTACCAACAATGAGTTCGGCCTGAGCGAGAAAGCTCAGAA  
GGAGTTGGTCAAGGTTCTTCTCGCCTCGCGTGGAGAGATGGAAGACAAGCGCATCGACGAGATCTTCGGTGAAGAGTTCTGAGCAGC  
AATTCTGGCTCTACTGGCGGACGATGTTTCGCGTTCGAGAACTGGCACTCCGCACTCGAGCTGAAGCTCTACCTGCACCGGTTCTGTGC  
ACCACATCGGCGGGCTCCCCGACCTTTCGGCGCTGAAGTTCACAAAGTACAACAGTACGAATCGCTCGTGTGCCATGTACCGCTG  
GCTCCTGGACCAGGGCGTGAGATTCGAGTTCTCCACCGAGGTACCGACATCGACTTCGTTTTCGACGGCGACCGTAAACAGGCCACC  
CGCATCCACTGGACAAAGGGCGGGTGCCTCGGCGGCGTTCGACCTCGGTCCCGACGACCTCGTGTCTGCCACGATCGGTTCTGCTCACAG  
AGAACTCCGACGACGGCACCCACCAACAATGCGGCCAGACTCGACGAAGTCCCGCGCGGCGTGGGACCTGTGGCGGCGCATCGCGGC  
CAAGCACCCCTCTTTCGGACGCCCGAGGTGTTCTGCGCGACATCTCGAAGACGAAGTGGGAGTCAGCGACGGTACCACCATCGGC  
CCTGAGATCCCGAGGTACATCAAGAAGATCGCAAGCGCGACCCGTTCTCCGGCAACATCGTCACCGCGGATCGTACCGCGAAAG  
ACTCGTCTGGCTGCTCAGCTGGACAGTCAACCGCCAGCCGACTTCAAAGCGCAAGCACCCGACGAGATCGTGTGGGTCTACGG  
CCTGTTTCGTAGACGTGCCCGGCGACTTACCGGCAAGACAATGCAGGAGTCGACCGGCGAAGAGATCACCCAAGAATGGCTCTATCAC  
TTGGGTGTGCCCGTTCGAGGACATCCCGAGCTCGCGGCAAACGGCGGAAGACCGTGCCTGTGATGATGCCCTACGTACCTCGTTCT  
TCATGCCCGCACCGCGGTGACCGCCCGAGTGGTGCCTCGAGGGCGCAGTGAAGTTCGCGTTCATCGGCCAGTTCGCCGAAACCAC  
GCGCGACACGATCTTACCACCGAGTACTCGGTGCGTACTGCGATGGAGGCCGCTACCAGCTGCTGGGCATCGATCGCGCGGTGCCG  
GAGGTGTTCAACTCCACCTATGATCTCAGGTTCTGCTCGAGGCCACCGCGCTTGC GCGACGGCGAGGAGTAGAGCTCCCCGGCC  
CGAAGTTCGTCCGCAACCGCATCATCAAGCACCTCGACCACACTCAGATCGGACAACCTCTCACCGACTTCGGAGTCATCCCCGAGCT  
CGACGGCACGACGAAACGAGTCCGTGCCGATGACGCCGAGCCTGA

### Amino-acid sequence *RpOhy*

MYSSGNYEAFARPRKPEGVENKTAWFVAGLTSMAVFMIRDGQLSGDKITILERLDLPGGALDGIKKPKDGFVIRGGREMEDHME  
CLWDLFRITPSLEVDGSLVLEFYWLNKDDPNYSLNRVTHRQEEFVTNNEFGLSEKAQKELVKVFLASREEMEDKRIDEIFGEEFLSS  
NFWLYWRMTMFAFENWHSAL ELKLYLHRFVHHIGGLPDL SALKFTKYNQYESLVLPMYRWLLDQGVRF EFSTEVTDIDFVFDGRKQAT  
RIHWTKGGVPGVDLGPDDLVLATIGSLTENSDDGTHHNAARLDEGPAPAWDLWRRIAAKHPSFGRPEVFCGDISKTKWESATVTTIG  
PEIPRYIKKIAKRDPFSGNIVTGGIVTAKDSSWLLSWTVNRQPHFKAQAPDEIVVVVYGLFVDVPGDFTGKTMQESTGEEITQEWLYH  
LGVVVEDIPELAANGAKTVPVMPYVTSFFMPRTAGDRPDVVPEGAVNFAF IGQFAETTRDTIFTTEYSVRTAMEAAYQLLGIDRGVP  
EVFNSTYDLRFLLEATARLRDGELEVELPGPKFVGNRI IKHL DHTQIGQLLTD FGVIP ELDGTTKRVRADDAGA

Nucleotide sequence synthetic *RpOhy* construct codon optimized for *E. coli* including his-tag

ATGGGGGGTTCTCATCATCATCATCATCATGGTATGGCTAGCATGACTGGTGGACAGCAAATGGGTGCGGGATCTGTACGACGATGACG  
ATAAGGATCGATGGGGATCCGAGCTCGAGATCTGCAGTACTATTCTTCGGGCAATTATGAGGCGTTCGCGCTCCTCGCAAACCCGA  
GGGCGTAGAGAAACAAGACGGCCTGGTTTGTGGGTGCAGGCTTGACGTCGATGGCCAGTGCGGTGTTCATGATCCGCGATGGACAACGT  
AGTGGCGACAAAATTACTATTTTTGGAACGTCTGGATCTCCCGGAGGGGCCCTGGATGGAATTAATAAGCCTGACAAGGATTTGTAA  
TCCGTGGAGGTCGCGAGATGGAAGATCACATGGAATGCCTTTGGGACTTGTTCGTACCATCCCGTCTTAGAAGTCCGATGGTTCCAGT  
CTTGGATGAATTTCTATTGGTTAAACAAGGACGACCCCTAACTATTCGTTAAATCGCGTGACACACCCGCCAAGGCGAAGAGTTTCGTTACC  
AATAATGAGTTTGGACTTTCCGAAAAGGCACAAAAGAGTTGGTCAAAGTTTCTTGGCGTCTCGTGAAGAAATGGAGGATAAACGTA  
TCGACGAGATTTTCGGGGAAGAATTTTATCATCAAACCTTTGGCTGTACTGGCGTACCATGTTTCGCTTTTGAAAACCTGGCATAGTGC  
ACTGGAGTTGAAACTGTACCTGCATCGTTTCGTGCATCACATCGGCGGATGCCTGATCTTCCGCCTTGAAATTTACAAAGTACAAT  
CAGTACGAAAAGTCTTGTGCTTCCAATGTATCGTTGGTTGTTGGATCAAGGAGTACGCTTTGAGTTCTTACCAGGTCACAGATATCG  
ATTTTGTGTTTCGATGGTGACCGCAAGCAGGCCACGCGTATCCATTGGACAAAAGGAGGTGTGCCAGGCGGAGTTGATTTAGGCCCCGA  
TGATTTAGTCTGGCAACAATCGGTAGCCTGACCGAGAATTTGACGACGGAACACACCATAATGCCGCGCGTTTAGACGAAGGACCG  
GCGCCCGCTTGGGACCTGTGGCGTCTGATTTGCCGCAAAACATCCGAGCTTCCGACGCCCCGAGGTTTTCTGTGGAGATATCTCAAAAA  
CAAAGTGGGAATCGGCTACCGTTACGACGATCGGACCCGAAATCCCGCGCTATATTAATAAGATCGCGAAGCGTGATCCCTTTTCGGG  
AAACATTGCTACTGGGGTATCGTGACGGCGAAAGACAGCAGCTGGTTACTTTCATGGACGGTCAACCGTCAACCACATTTCAAGGCA  
CAAGCGCCAGATGAGATTGTTGTGTGGGTGTATGGTCTGTTTCGTAGATGTACCAGGGGATTTTACTGGTAAGACAATGCAGGAGAGTA  
CCGGGGAAGAGATCACTCAGGAGTGGTTATACCATCTGGGAGTGCTGTAGAAGATATCCCGAGTTAGCGGCAACCGCGCAAAAAC  
GGTACCCGTCATGATGCCTTACGTCACGTCATTTCTTTATGCCTCGTACAGCTGGGGATCGCCCCGAGTGGTCCAGAAGGTGCCGTT  
AATTTGCCTTCATTGGTCACTTCGCTGAGACAACGCGGATACTATCTTACGACAGAATACTCAGTGCCTACAGCCATGGAGGCAG  
CTTACCAATTGCTGGGCATCGATCGTGGCGTGCCCGAAGTGTAACTCTACTTATGATTTACGCTTCTTGTGGAGGCTACCGCTCG  
TTTGGCGGATGGCGAAGAGGTGGAGCTGCCCGGGCCATAATTTGATAGGCAACCGCATCATTAACACCTTGATCATAACAAATTTGGT  
CAATTATTGACTGACTTTGGCGTCATTCCGGAACCTGGACGGTACTACTAAACGTGTCCGTGCTGATGACGCCGGAGCATGA

Amino-acid sequence synthetic *RpOhy* construct including His-tag

MGGSHHHHHGMASMTGGQQMGRDLYDDDDKDRWGSELEICSYSSGNYEAFARPRKPEGVENKTAWFVGAGLTSMASAVFMIRDGQL  
SGDKITILERLDLPGGALDGIKKPKDGFVIRGGREMEDHMECLWDLFRITPSLEVDGSVLEDEFYWLNKDDPNYSLNRVTHRQGEFVT  
NNEFGLSEKAQKELVKVFLASREEMEDKRIDEIFGEEFLSSNFWLYWRTMFAFENWHSALLELKYLRHFVHHIGGLPDL SALKFTKYN  
QYESLVLPMYRWLLDQVRFEFSTEVTDIDFVFDGDRKQATRIHWTKGGVPGVDLGPDDLVLATIGSLTENSDDGTHHNAARLDEGP  
APAWDLWRRIAAKHPSFGRPEVFCGDISKTKWESATVTTIGPEIPRYIKKIAKRDPFSGNIVTGGIVTAKDSSWLLSWTVNRQPHFKA  
QAPDEIVVVVYGLFVDVPGDFTGKTMQESTGEEITQEWLYHLGVPVEDIPELAANGAKTVPVMMPYVTSFFMPRTAGDRPDVVEGAV  
NFAFIGQFAETTRDTIFTTEYSVRTAMEAAYQLLGI DRGVPEVFNSTYDLRFLLEATARLRDGEVEVLPKPFVGNRIKHL DHTQIG  
QLLTDFGVIPELDGTTKRVRADDAGA

## References

- Aziz RK, Bartels D, Best A, DeJongh M, Disz T, Edwards RA, Formsma K, Gerdes S, Glass EM, Kubal M, Meyer F, Olsen GJ, Olson R, Osterman AL, Overbeek RA, McNeil LK, Paarmann D, Paczian T, Parrello B, Pusch GD, Reich C, Stevens R, Vassieva O, Vonstein V, Wilke A, Zagnitko O (2008) The RAST Server: Rapid annotations using subsystems technology. *BMC Genomics* 9. <https://doi.org/10.1186/1471-2164-9-75>
- Edgar RC (2004) MUSCLE: multiple sequence alignment with high accuracy and high throughput. *Nucleic Acids Res* 32:1792–1797. <https://doi.org/10.1093/nar/gkh340>
- Kumar S, Stecher G, Tamura K (2016) MEGA7: Molecular Evolutionary Genetics Analysis Version 7.0 for Bigger Datasets. *Mol Biol Evol* 33:1870–4. <https://doi.org/10.1093/molbev/msw054>
- Madeira F, Park Y mi, Lee J, Buso N, Gur T, Madhusoodanan N, Basutkar P, Tivey ARN, Potter SC, Finn RD, Lopez R (2019) The EMBL-EBI search and sequence analysis tools APIs in 2019. *Nucleic Acids Res* 47:W636–W641. <https://doi.org/10.1093/nar/gkz268>
- Price MN, Dehal PS, Arkin AP (2010) FastTree 2 - Approximately maximum-likelihood trees for large alignments. *PLoS One* 5:e9490. <https://doi.org/10.1371/journal.pone.0009490>
- Schmid J, Steiner L, Fademrecht S, Pleiss J, Otte KB, Hauer B (2016) Biocatalytic study of novel oleate hydratases. *J Mol Catal B Enzym* 133:S243–S249. <https://doi.org/10.1016/j.molcatb.2017.01.010>
